# Supplementary material for: Bird Extinctions in Brazil’s Atlantic Forest and How They Can Be Prevented
Source: Frontiers journal article supplement (doi:10.3389/fevo.2021.624587), 2021-05-13
Supplement: Data_Sheet_1.PDF [file Data_Sheet_1.PDF]

# Gone or missing

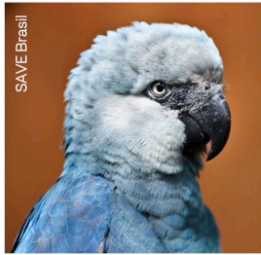

**1. Spix's Macaw** (EW) declined and disappeared from the wild because of trapping and habitat loss in the Caatinga. It survives only in captivity, with releases planned

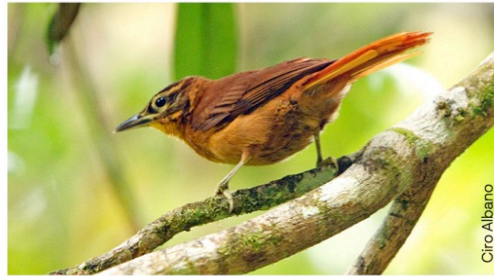

**2. Alagoas Foliage-gleaner** (EX), Cryptic Treehunter (EX) and Pernambuco Pygmy-owl (CR-PE) have been lost because of clearance of the Atlantic Forest in NE Brazil for sugarcane, cattle pasture and other agricultural activities

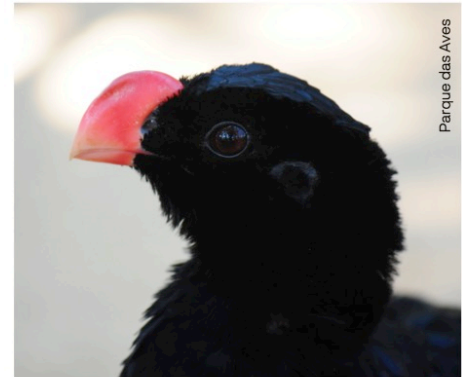

**3. Alagoas Curassow** (EW) was eliminated in the wild by hunting and habitat loss, but reintroductions finally started in 2019 with six birds released

Map data: BirdLife International and Handbook of the Birds of the World (2019); Muijlaert et al. (2018)

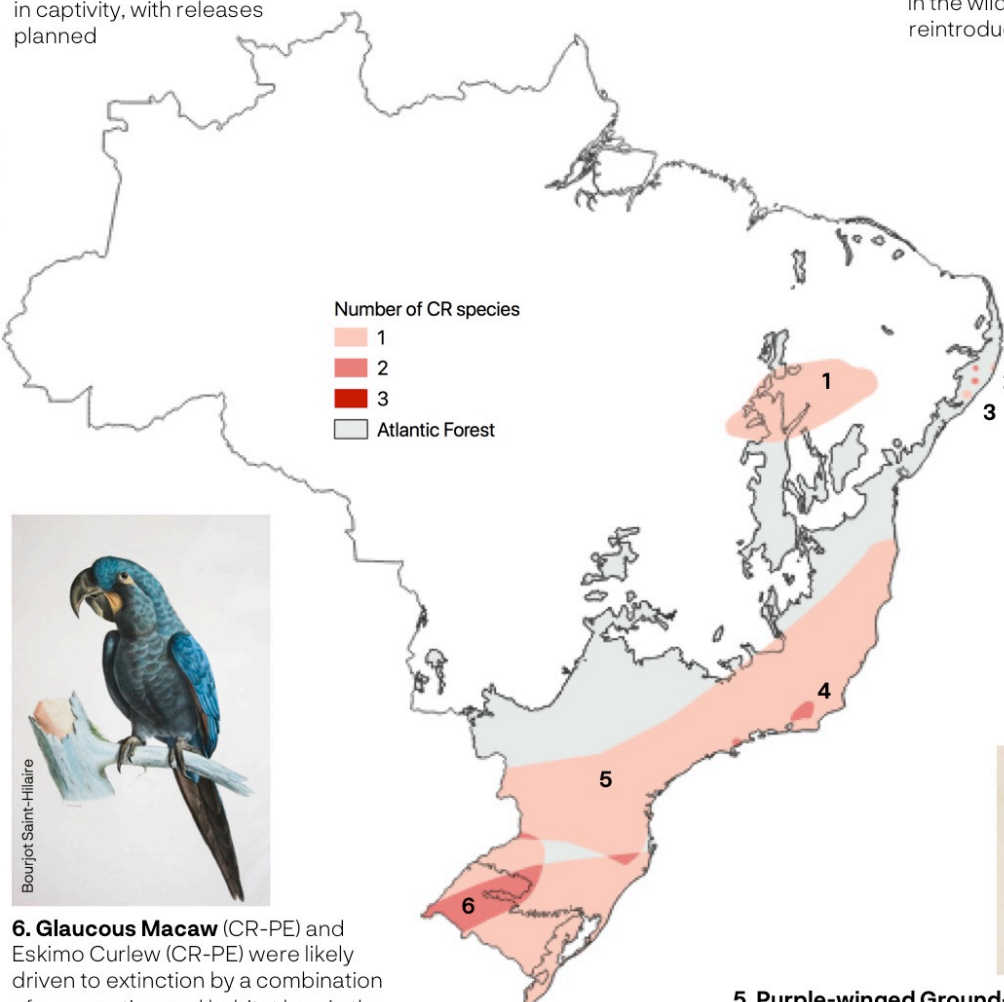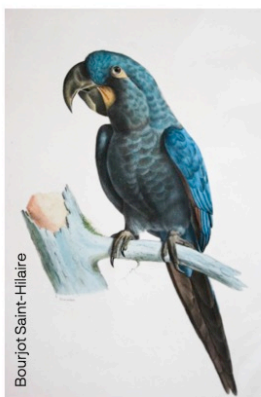

**6. Glaucous Macaw** (CR-PE) and Eskimo Curlew (CR-PE) were likely driven to extinction by a combination of persecution and habitat loss in the extreme southwestern Atlantic Forest and Pampas

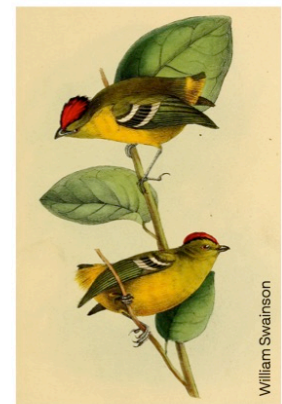

**4. Kinglet Calyptura** (CR) went unrecorded through the 20th century until a reported sighting in 1996; its decline and possible extinction is likely the result of deforestation and forest degradation

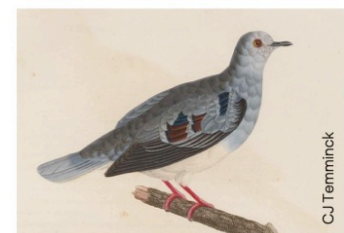

**5. Purple-winged Ground-dove** (CR) is, or was, a nomadic bamboo specialist, with loss of forest across its former range probably the main reason for its disappearance

**Supplementary Figure S1.** Former distributions of bird species of Brazil that are globally Extinct, Extinct in the Wild, or possibly extinct (see Table 1 in the main text).
